# Supplementary material for: Microbial signatures of neonatal bacterial meningitis from multiple body sites
Source: PubMed Central journal article supplement (PMC10477713; doi:10.3389/fcimb.2023.1169101), 2023-08-22

Figure S1

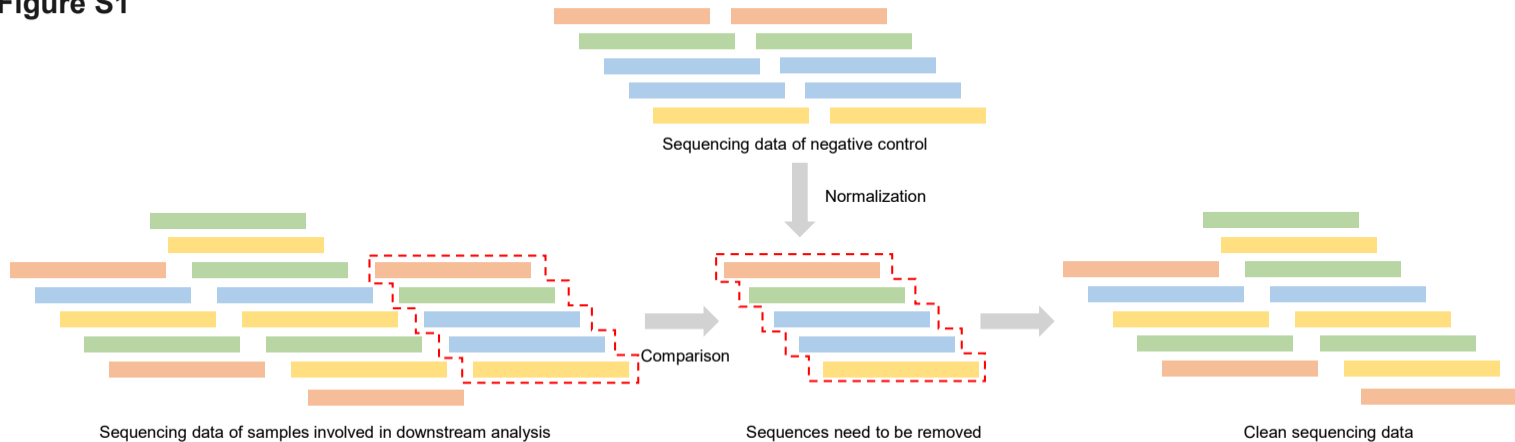

Supplement: Image_1.pdf [file Image_1.pdf]
